# Supplementary material for: The mitochondrial genome of Endoconidiophora resinifera is intron rich
Source: PubMed Central journal article supplement (PMC6279837; doi:10.1038/s41598-018-35926-y), 2018-12-04
Supplement: 41598_2018_35926_MOESM1_ESM.pdf [file 41598_2018_35926_MOESM1_ESM.pdf]

**Supplementary Materials:**

**The mitochondrial genome of *Endoconidiophora resinifera* is intron rich.**

Abdullah Zubaer, Alvan Wai, Georg Hausner\*

Department of Microbiology, University of Manitoba, Winnipeg, MB R3T 2N2

\*Corresponding Author

hausnerg@cc.umanitoba.ca

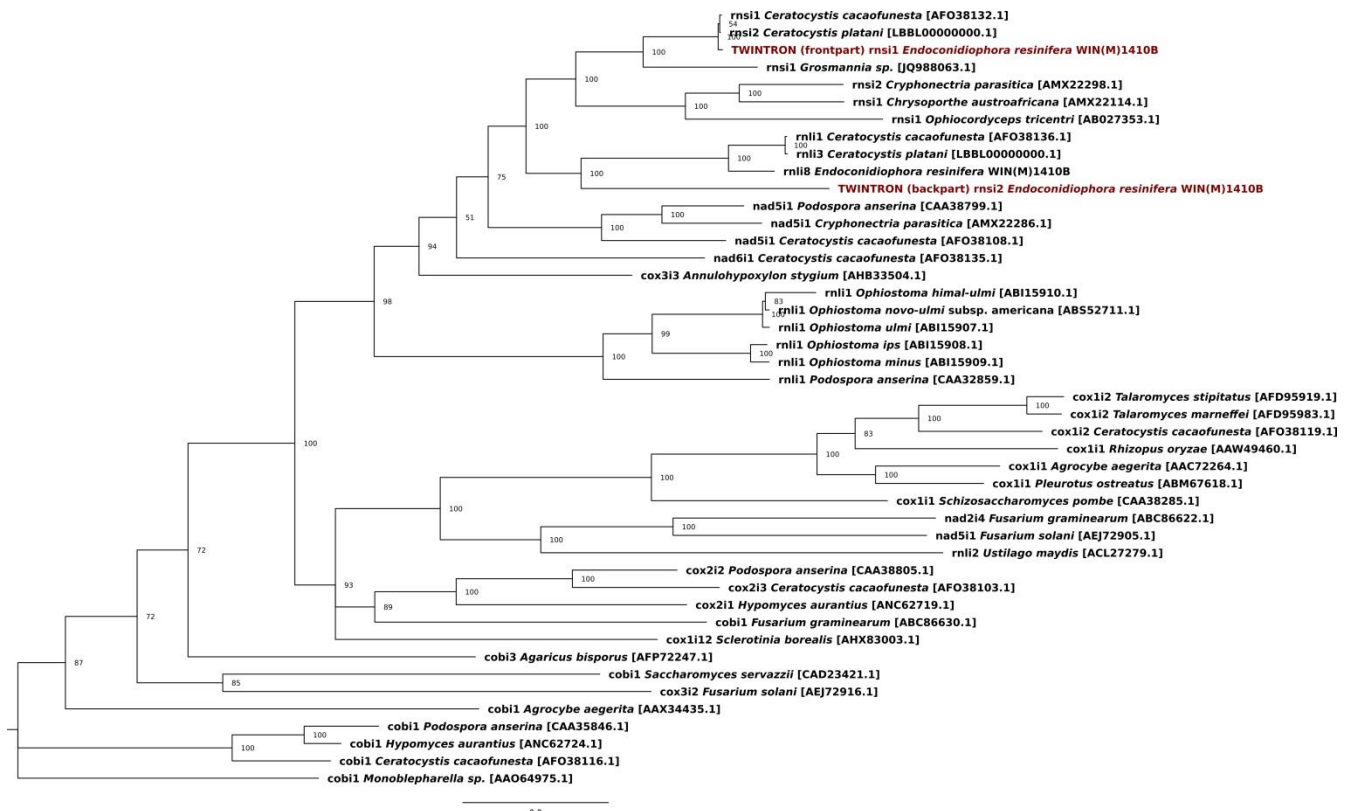

Supplementary Figure 1: Phylogenetic tree of the mS917 group ID introns encoded ORFs (from *rns* gene of *Endoconidiophora resinifera* WIN(M)1410B) and its homologues from different fungal species. The dataset included the amino acid sequences of 45 intron-encoded ORFs and processed for 1 million generation in MrBayes with the mixed-model default setting. Gene names (with its intron number), species name and NCBI accession number are mentioned for each species. The front part of the tandem intron (mS917) is found in the *rns* intron clade whereas the downstream component is clustered with the *rnl* intron ORFs.

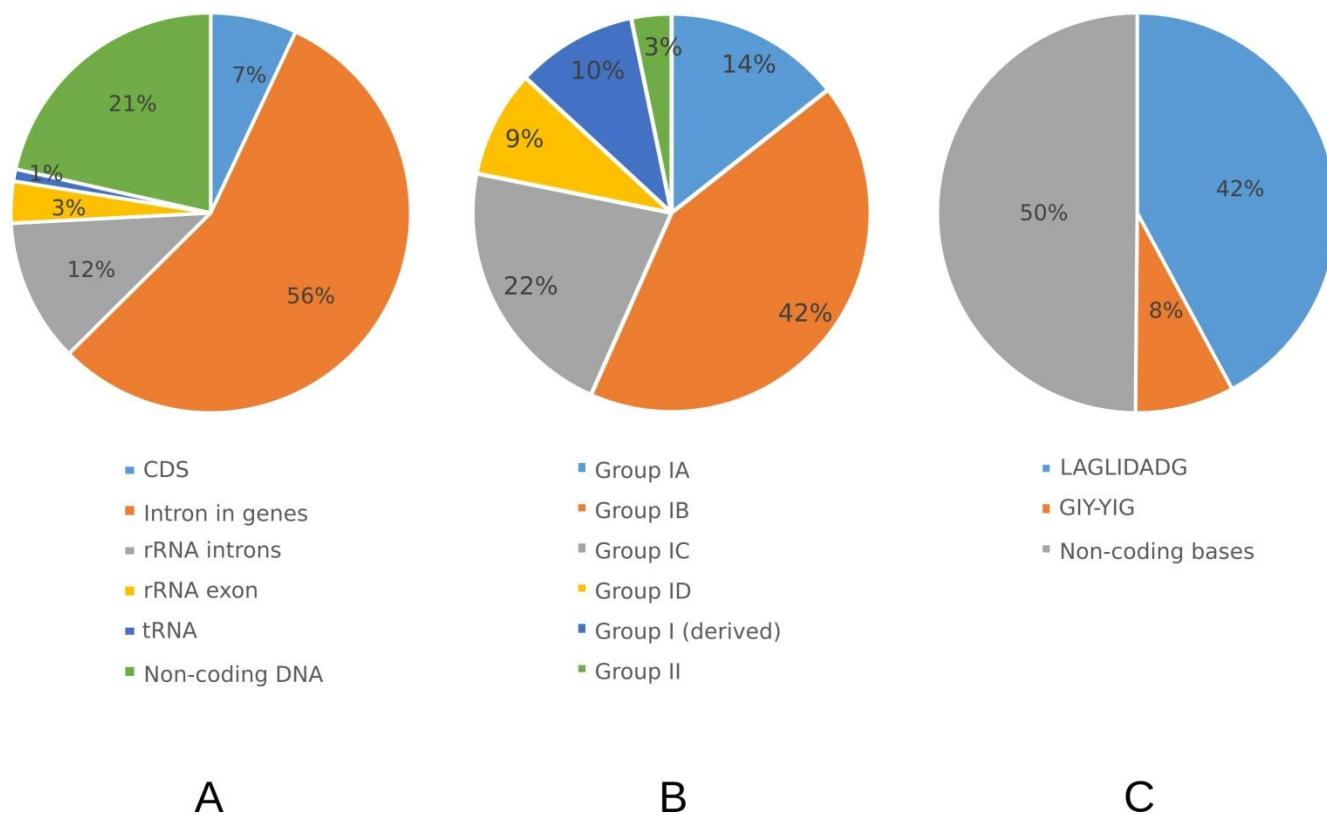

Supplementary Figure 2: Composition of the mitochondrial genome of *Endoconidiophora resinifera*.

(A) The proportion of the protein coding genes (CDS and introns), rRNA genes (exon and intron), tRNA genes and intergenic (non-coding) sequences. (B) Introns (in protein coding and rRNA genes) are further categorised into their subtypes (such as group IA, IB, IC, ID, derived I, and group II). (C) Composition of the introns in terms of their encoded ORFs (either LAGLIDADG or GIY-YIG homing endonuclease gene) and non-coding bases in introns.

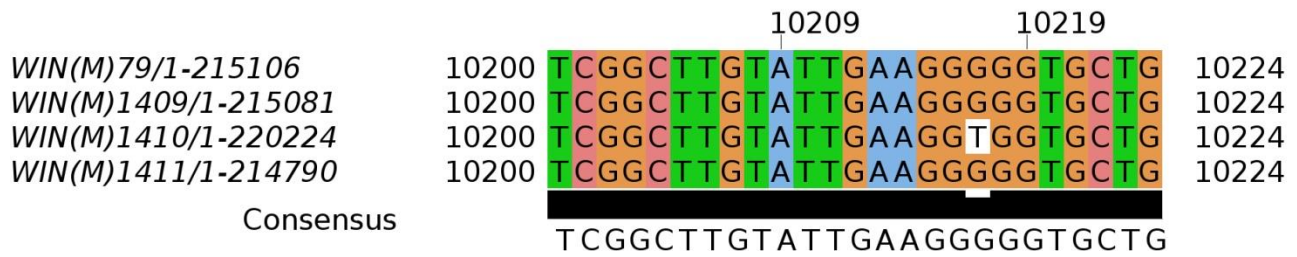

Supplementary Figure 3: Multiple sequence alignment of the four strains of *Endoconidiophora resinifera*. The represented region is a part of a CDS in *cox1* gene where the WIN(M)1410B strain has a single nucleotide polymorphism (SNP), a transversion of G to T. That is the only SNP found in the CDS region among those strains.

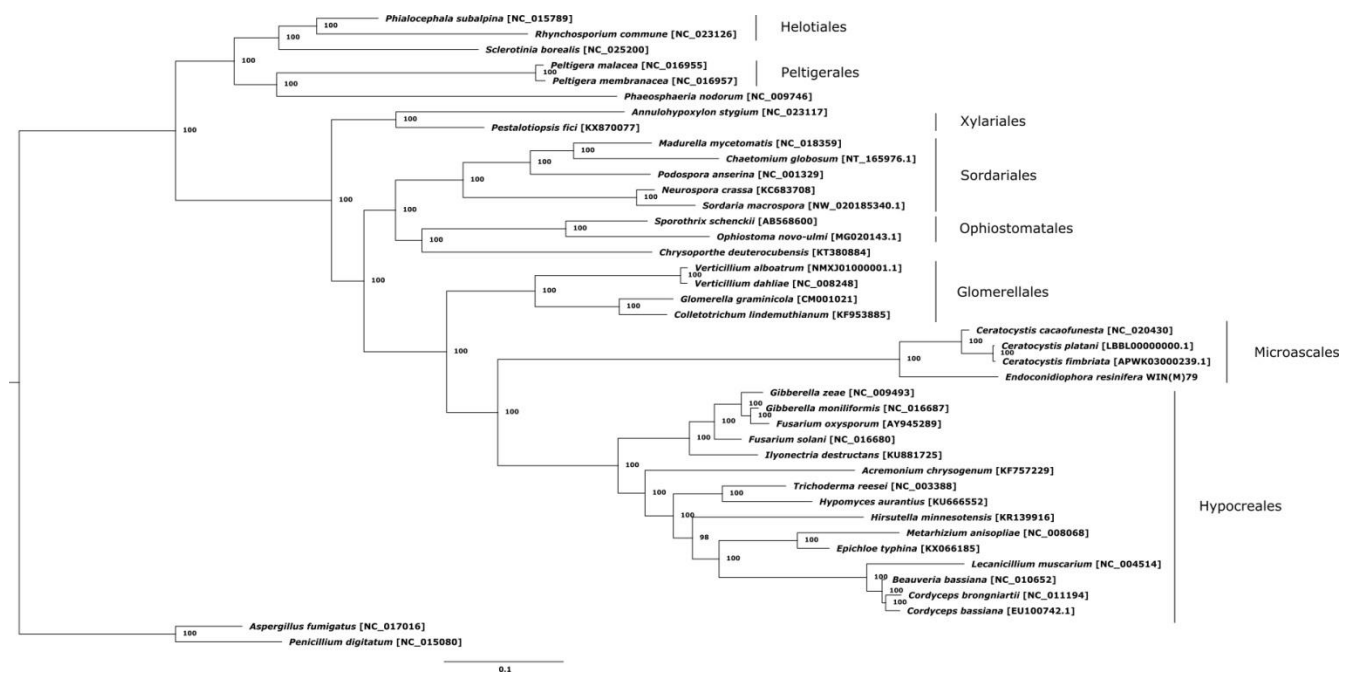

Supplementary Figure 4: Phylogenetic position of *Endoconidiophora resinifera* among the Ascomycota. The tree was inferred by Bayesian method in MrBayes using 1 million generation with the gamma-distributed rates model. The dataset was prepared by concatenating amino-acid sequences of the mitochondrial proteins extracted from NCBI genome database. The fungal species are clustered according to their orders in the tree rooted with *Aspergillus* and *Penicillium*. The *Endoconidiophora resinifera* placed with along with the related *Ceratocystis* species into a distinct clade.

Supplementary Table 1: List of introns (group I and group II) in each gene in *E. resinifera* strain WIN(M)79.

| Name of the gene | Group IA introns | Group IB introns | Group IC introns | Group ID introns | Group I (derived) introns | Total Group I introns | Group II introns | Total number of Introns |
|------------------|------------------|------------------|------------------|------------------|---------------------------|-----------------------|------------------|-------------------------|
| <i>cox1</i>      | 1                | 17               | 1                | 1                | 2                         | 22                    | 1                | 23                      |
| <i>nad1</i>      | 2                | 3                | -                | -                | -                         | 5                     | -                | 5                       |
| <i>nad4</i>      | -                | 1                | 1                | -                | -                         | 2                     | -                | 2                       |
| <i>atp8</i>      | -                | -                | -                | -                | -                         | -                     | -                | -                       |
| <i>atp6</i>      | -                | -                | -                | -                | -                         | -                     | -                | -                       |
| <i>rns</i>       | -                | -                | 1                | 1                | 2                         | 4                     | 1                | 5                       |
| <i>cox3</i>      | 3                | 2                | 2                | 2                | -                         | 9                     | -                | 9                       |
| <i>nad6</i>      | -                | -                | -                | 1                | -                         | 1                     | -                | 1                       |
| <i>rnl</i>       | 3                | 1                | 4                | 1                | 1                         | 9                     | 1                | 11                      |
| <i>rps3</i>      | -                | -                | -                | -                | -                         | -                     | -                | -                       |
| <i>nad2</i>      | -                | -                | 4                | -                | 1                         | 5                     | -                | 5                       |
| <i>nad3</i>      | -                | -                | -                | -                | -                         | -                     | -                | -                       |
| <i>atp9</i>      | -                | -                | -                | -                | -                         | -                     | -                | -                       |
| <i>cox2</i>      | -                | 2                | 2                | -                | 1                         | 5                     | -                | 5                       |
| <i>nad4L</i>     | -                | -                | 1                | -                | -                         | 1                     | -                | 1                       |
| <i>nad5</i>      | -                | 3                | -                | 2                | 2                         | 7                     | -                | 7                       |
| <i>cob</i>       | 3                | 3                | 1                | -                | -                         | 7                     | -                | 7                       |
| <b>Total</b>     | <b>12</b>        | <b>32</b>        | <b>17</b>        | <b>8</b>         | <b>9</b>                  | <b>77</b>             | <b>3</b>         | <b>81</b>               |

Supplementary Table 2: List of the genetic components found in intergenic regions. Most of them are degenerated HEGs, however gene duplications and a RNA polymerase gene fragment were also found.

| <b>Gene name</b>         | <b>Start (genomic position)</b> | <b>End (genomic position)</b> |
|--------------------------|---------------------------------|-------------------------------|
| RNA Polymerase (rnap)    | 50255                           | 50575                         |
| HEG (GIY-YIG)            | 75590                           | 76156                         |
| HEG (GIY-YIG)            | 76179                           | 76667                         |
| HEG (GIY-YIG)            | 76570                           | 76890                         |
| HEG (GIY-YIG)            | 78102                           | 78674                         |
| HEG (GIY-YIG)            | 78675                           | 79124                         |
| HEG (LAGLIDADG)          | 79896                           | 80213                         |
| HEG (LAGLIDADG)          | 80323                           | 80727                         |
| ATP Synthase su.6 (atp6) | 81091                           | 81417                         |
| HEG (GIY-YIG)            | 92287                           | 92598                         |
| HEG (LAGLIDADG)          | 111547                          | 112203                        |
| HEG (LAGLIDADG)          | 112002                          | 112985                        |
| HEG (GIY-YIG)            | 145826                          | 146419                        |
| HEG (GIY-YIG)            | 146368                          | 146736                        |
| HEG (GIY-YIG)            | 146670                          | 147176                        |
| HEG (LAGLIDADG)          | 152425                          | 153078                        |
| HEG (LAGLIDADG)          | 211869                          | 212420                        |
| HEG (LAGLIDADG)          | 212342                          | 212764                        |
| HEG (LAGLIDADG)          | 212868                          | 213275                        |
| Cytochrome b (cob)       | 213807                          | 214152                        |

Supplementary Table 3: Notable differences in genes (exons and introns) sequences from different *E. resinifera* strains.

| Exon sequence<br>in<br>Gene (name)   | Nucleotide position in the genome |               |               |               | Remarks                            |
|--------------------------------------|-----------------------------------|---------------|---------------|---------------|------------------------------------|
|                                      | WIN(M)79<br>(reference)           | WIN(M)1409A   | WIN(M)1410B   | WIN(M)1411    |                                    |
| <i>rnl</i>                           | 131931                            | 128784-130899 | 132034-134149 |               | Insertion                          |
|                                      | 132449                            | 131416-135650 |               |               | Insertion (intron<br>exon overlap) |
| <i>cox1</i>                          | 10217                             |               | 10217         |               | Substitution (G to<br>T)           |
| <i>trnA</i>                          | 150313                            |               |               | 149242-150088 | Insertion                          |
| Intron sequence<br>in<br>Gene (name) | Nucleotide position in the genome |               |               |               | Remarks                            |
|                                      | WIN(M)79<br>(reference)           | WIN(M)1409A   | WIN(M)1410B   | WIN(M)1411    |                                    |
| <i>cox1</i>                          | 10226                             |               | 10226-11548   |               | Novel intron                       |
|                                      | 17008                             | 17008-17041   |               |               | Insertion                          |
|                                      | 20796                             |               | 22117-22146   | 20796-20825   | Insertion                          |
|                                      | 27592                             | 27653         |               |               | Deletion                           |
|                                      | 28800-30348                       | 28859         | 30149         | 28828         | Novel intron in<br>WIN(M)79        |
|                                      | 30360-32013                       | 28869         | 30159         | 28838         | Novel intron in<br>WIN(M)79        |
| <i>rns</i>                           | 85745                             |               | 83902-85657   |               | mS917 Twintron                     |
| <i>rnl</i>                           | 131931                            |               |               | 128745-130860 | Insertion                          |
|                                      | 132443-132457                     |               | 134660-135555 |               | Insertion                          |
|                                      | 132597                            |               | 135695-135737 |               | Insertion                          |
| <i>cox2</i>                          | 168549                            |               | 171691-173721 |               | Novel intron                       |
| <i>cob</i>                           | 203413-203430                     |               | 208583        |               | Deletion                           |
|                                      | 204218-204220                     |               | 209371        |               | Deletion                           |
| <i>nad1</i>                          | 62101                             |               |               | 58934         | Substitution (A to<br>T)           |



Supplementary Table 4: The order of the tRNA genes (trn\*) from four different species. [The asterisk (\*) represent an amino acid that is the product of the trn\* gene]

| Organism               | tRNA gene (trn*) order |   |   |   |   |   |   |   |   |   |   |   |   |   |   |   |   |   |   |   |   |   |   |   |   |   |   |   |   |   |   |
|------------------------|------------------------|---|---|---|---|---|---|---|---|---|---|---|---|---|---|---|---|---|---|---|---|---|---|---|---|---|---|---|---|---|---|
| <i>E. resinifera</i>   | R                      |   | M | Y | G | K | D | S | W | V |   | I | S | N | P | T | E | I | M | L | A | F | L |   | Q | H | M |   | W | R | C |
| <i>C. cacaofunesta</i> | R                      | I | M | Y | G | K | D | S | W | V | W | I | S | N | P | T | E | L | M | L | A | F | L | L | Q | H | M | M |   | R | C |
| <i>C. platani</i>      | R                      |   | M | Y | G | K | D | S | W | V | W | I | S | N | P | T | E | L | M | L | A | F | L | L | Q | H | M |   |   |   |   |
| <i>C. fimbriata</i>    | R                      | I | M | Y | G | K | D | S |   | V | W |   |   | N | P | T | E | L | M | L | A | F | L | L |   | H | M | M |   |   | C |
